# Supplementary material for: Dietary Intake of Polyphenols Enhances Executive/Attentional Functioning and Memory with an Improvement of the Milk Lipid Profile of Postpartum Women from Argentina
Source: MDPI journal article supplement (doi:10.3390/jintelligence10020033), 2022-05-31
Supplement: s1 [file s1]

**Table S1.** Contributions and representation qualities for each polyphenol consumed above 20 mg/d on the first two axes.

| <b>Polyphenol (mg/d)</b> | <b>Contribution</b> |               | <b>QRL</b>    |               |
|--------------------------|---------------------|---------------|---------------|---------------|
|                          | <b>Axis 1</b>       | <b>Axis 2</b> | <b>Axis 1</b> | <b>Axis 2</b> |
| Hesperetin               | 7                   | 235           | 7             | 242           |
| Quercetin 3–O–rutinoside | 945                 | 35            | 945           | 980           |
| 1–Caffeoylquinic acid    | 931                 | 60            | 931           | 991           |
| 1,3–Dicafeoylquinic acid | 931                 | 60            | 931           | 991           |
| 1,4–Dicafeoylquinic acid | 931                 | 60            | 931           | 991           |
| 3,4–Dicafeoylquinic acid | 968                 | 28            | 968           | 996           |
| 3–Caffeoylquinic acid    | 803                 | 112           | 803           | 915           |
| 4,5–Dicafeoylquinic acid | 931                 | 60            | 931           | 991           |
| 4–Caffeoylquinic acid    | 748                 | 133           | 748           | 881           |
| 5–Caffeoylquinic acid    | 849                 | 98            | 849           | 947           |
| Caffeic acid             | 26                  | 703           | 26            | 729           |
| Ferulic acid             | 20                  | 224           | 20            | 244           |
| Lariciresinol            | 54                  | 357           | 54            | 411           |

*Note.* The axes establish the HJ-Biplot reference system and represent latent factorial variables obtained from linear combinations of the initially observed variables. QLR = Quality of representation.

**Table S2.** Contributions and representation qualities for each polyphenol consumed from 5 to 20 mg/d on the first two axes.

| Polyphenol (mg/d)                | Contribution |        | QLR    |        |
|----------------------------------|--------------|--------|--------|--------|
|                                  | Axis 1       | Axis 2 | Axis 1 | Axis 2 |
| Malvidin 3-O-glucoside           | 275          | 116    | 275    | 391    |
| (-)-Epicatechin                  | 621          | 15     | 621    | 636    |
| (-)-Epigallocatechin             | 691          | 146    | 691    | 837    |
| (-)-Epigallocatechin 3-O-gallate | 687          | 147    | 687    | 834    |
| (-)-Epicatechin 3-O-gallate      | 731          | 126    | 731    | 857    |
| (+)-Catechin                     | 655          | 67     | 655    | 722    |
| (+)-Gallocatechin                | 689          | 146    | 689    | 835    |
| Procyanidin dimer B2             | 321          | 54     | 321    | 375    |
| Eriodyctiol                      | 75           | 2      | 75     | 77     |
| Naringenin                       | 0            | 80     | 0      | 80     |
| Quercetin                        | 632          | 68     | 632    | 700    |
| 5-O-Galloylquinic acid           | 687          | 148    | 687    | 835    |
| Ellagic acid                     | 90           | 57     | 90     | 147    |
| Syringic acid                    | 63           | 77     | 63     | 140    |
| Disuccinoylquinic acid           | 10           | 484    | 10     | 494    |
| 3-Feruloylquinic acid            | 0            | 656    | 0      | 656    |
| 4-Feruloylquinic acid            | 33           | 743    | 33     | 776    |
| 5-Feruloylquinic acid            | 38           | 734    | 38     | 772    |
| Caffeoyl-glucose                 | 10           | 484    | 10     | 494    |
| o-Coumaric acid                  | 69           | 122    | 69     | 191    |
| p-Coumaric acid                  | 145          | 281    | 145    | 426    |
| Trans-ferulic acid               | 13           | 2      | 13     | 15     |
| Pinoresinol                      | 79           | 175    | 79     | 254    |

*Note.* The axes establish the HJ-Biplot reference system and represent latent factorial variables obtained from linear combinations of the initially observed variables. QLR = Quality of representation.

**Table S3.** Contributions and representation qualities for each executive/attentional score on the first two axes.

| Scores                                  | Contribution |        | QLR    |        |
|-----------------------------------------|--------------|--------|--------|--------|
|                                         | Axis 1       | Axis 2 | Axis 1 | Axis 2 |
| WCST: Trials administered               | 783          | 69     | 783    | 852    |
| WCST: Correct responses                 | 81           | 536    | 81     | 617    |
| WCST: % Total errors                    | 953          | 18     | 953    | 971    |
| WCST: % Perseverative responses         | 118          | 257    | 118    | 375    |
| WCST: % Perseverative errors            | 28           | 194    | 28     | 222    |
| WCST: % Non-perseverative errors        | 804          | 113    | 804    | 917    |
| WCST: Conceptual level responses        | 548          | 269    | 548    | 817    |
| WCST: % Conceptual level responses      | 952          | 10     | 952    | 962    |
| WCST: Categories achieved               | 900          | 29     | 900    | 929    |
| WCST: Global score                      | 927          | 5      | 927    | 932    |
| WCST: Trials to complete first category | 220          | 132    | 220    | 352    |
| WCST: Failure to maintain set           | 122          | 117    | 122    | 239    |
| WCST: Learning to learn                 | 505          | 3      | 505    | 508    |
| SCWT: Word                              | 75           | 254    | 75     | 329    |
| SCWT: Color                             | 68           | 233    | 68     | 301    |
| SCWT: Word-color                        | 220          | 347    | 220    | 567    |
| SCWT: Interference                      | 38           | 208    | 38     | 246    |
| FVT: Phonological, Letter Excluded A    | 124          | 113    | 124    | 237    |

*Note.* The axes establish the HJ-Biplot reference system and represent latent factorial variables obtained from linear combinations of the initially observed variables. QLR = Quality of representation; WCST = Wisconsin Card Sorting Test; SCWT = Stroop Color Word Test; FVT = Verbal Fluency Task.

**Table S4.** Contributions and representation qualities for each memory score on the first two axes.

| Score                               | Contribution |        | QLR    |        |
|-------------------------------------|--------------|--------|--------|--------|
|                                     | Axis 1       | Axis 2 | Axis 1 | Axis 2 |
| RAVLT: Trial A1                     | 480          | 1      | 480    | 481    |
| RAVLT: Trial A5                     | 565          | 152    | 565    | 717    |
| RAVLT: $\Sigma$ A1–A5               | 932          | 13     | 932    | 945    |
| RAVLT: Interference (trial B)       | 398          | 15     | 398    | 413    |
| RAVLT: Post-interference (trial A6) | 647          | 40     | 647    | 687    |
| RAVLT: Delayed recall (trial A7)    | 703          | 161    | 703    | 864    |
| RAVLT: Recognition (trial A8)       | 337          | 107    | 337    | 444    |
| RAVLT: Errors of repetitions        | 58           | 0      | 58     | 58     |
| RAVLT: Intrusion errors             | 84           | 34     | 84     | 118    |
| RAVLT: Corrected total learning     | 109          | 185    | 109    | 294    |
| RAVLT: Learning                     | 227          | 37     | 227    | 264    |
| RAVLT: Forgetting                   | 14           | 885    | 14     | 899    |
| RAVLT: % of forgetting              | 1            | 903    | 1      | 904    |
| RAVLT: Forgetting speed             | 16           | 125    | 16     | 141    |
| RAVLT: Retention                    | 28           | 134    | 28     | 162    |
| RAVLT: Evocation                    | 121          | 38     | 121    | 159    |
| RAVLT: Primacy                      | 630          | 42     | 630    | 672    |
| RAVLT: Recency                      | 645          | 30     | 645    | 675    |
| RAVLT: Total hit rate               | 928          | 15     | 928    | 943    |
| RAVLT: Primacy hit rate             | 633          | 43     | 633    | 676    |
| RAVLT: Middle hit rate              | 731          | 0      | 731    | 731    |
| RAVLT: Recency hit rate             | 627          | 27     | 627    | 654    |
| RAVLT: Memory Efficiency Index      | 82           | 528    | 82     | 610    |
| RAVLT: Proactive interference       | 0            | 17     | 0      | 17     |
| RAVLT: Retroactive interference     | 36           | 411    | 36     | 447    |
| VFT: Phonological, Letter P         | 198          | 20     | 198    | 218    |
| VFT: Phonological, Letter F         | 145          | 42     | 145    | 187    |
| VFT: Semantic, Animals              | 347          | 19     | 347    | 366    |

*Note.* The axes establish the HJ-Biplot reference system and represent latent factorial variables obtained from linear combinations of the initially observed variables. QLR = Quality of representation; RAVLT = Rey Auditory Verbal Learning Test; VFT = Verbal Fluency Task.

**Table S5.** Human milk lipids according to extraction time, gestational age at delivery, breastfeeding frequency, and dietary macronutrients.

|                               | TAG (g/L) |          | Chol (g/L) |          | OTAG (OD/g) |          | PO (OD/mg) |          | NPO (OD/mg) |          |
|-------------------------------|-----------|----------|------------|----------|-------------|----------|------------|----------|-------------|----------|
|                               | F         | <i>p</i> | F          | <i>p</i> | F           | <i>p</i> | F          | <i>p</i> | F           | <i>p</i> |
| Milk extraction time          | 0.61      | 0.5470   | 0.67       | 0.5168   | 0.16        | 0.8519   | 0.93       | 0.4023   | 1.96        | 0.1508   |
| Gestational age at delivery   | 1.86      | 0.1780   | 0.13       | 0.7151   | 0.38        | 0.5384   | 0.54       | 0.4651   | 0.31        | 0.5796   |
| Fat quality index             | 0.16      | 0.6879   | 0.19       | 0.6632   | 0.07        | 0.7970   | 0.73       | 0.3962   | 0.01        | 0.9115   |
| Protein to carbohydrate ratio | 0.00      | 0.9934   | 3.02       | 0.0883   | 3.53        | 0.0658   | 0.19       | 0.6644   | 2.41        | 0.1264   |
| Breastfeeding frequency       | 0.08      | 0.7831   | 0.16       | 0.6945   | 0.04        | 0.8458   | 0.00       | 0.9782   | 1.96        | 0.1678   |

*Note.* TAG = triacylglycerols, Chol = cholesterol; OTAG = oxidized triacylglycerols; PO = polar oxysterols; NPO = non-polar oxysterols. F = F-value of ANCOVA.
